# Supplementary material
Source: Research Square preprint supplement (doi:10.21203/rs.3.rs-9039701/v1)

***Supplementary Table 1. Exploratory multivariable Cox proportional hazards models for overall survival after allogeneic hematopoietic stem cell transplantation***

| ***Variable*** | **Model 1**  **Age-based aHR (95% CI)** | **p-value** | **Model 2 DIPSS-based aHR (95% CI)** | **p-value** |
| --- | --- | --- | --- | --- |
| Age ≥60 vs <60 | 1.65 (0.66-4.15) | 0.3 | - | - |
| DIPSS high vs intermediate* | - | - | 2.91 (1.27-6.63) | 0.011 |
| HCT-CI† high vs low | 1.23 (0.57-2.67) | 0.6 | 0.98 (0.44-2.19) | >0.9 |
| Donor type: non-MSD‡ vs MSD | 1.18 (0.45-3.06) | 0.7 | 1.09 (0.42-2.78) | 0.9 |

Abbreviations: CI, confidence interval; HR, hazard ratio; HCT-CI, Hematopoietic Cell Transplantation–Comorbidity Index; DIPSS, Dynamic International Prognostic Scoring System; MSD, matched sibling donor; MUD, matched unrelated donor.
*Intermediate = DIPSS Int-1 and Int-2 combined.
†HCT-CI High ≥3 and HCT-CI Low <3
‡non-MSD = haploidentical donor or matched unrelated donor.

***Supplementary Figure 1. Overall survival by age group (≥60 vs <60 years). Median OS was 8.0 months (95% CI 5.4–36.3) in the ≥60-year group and 15.2 months (95% CI 6.3–NR) in the <60-year group (log-rank p=0.16). Analyses are exploratory.***


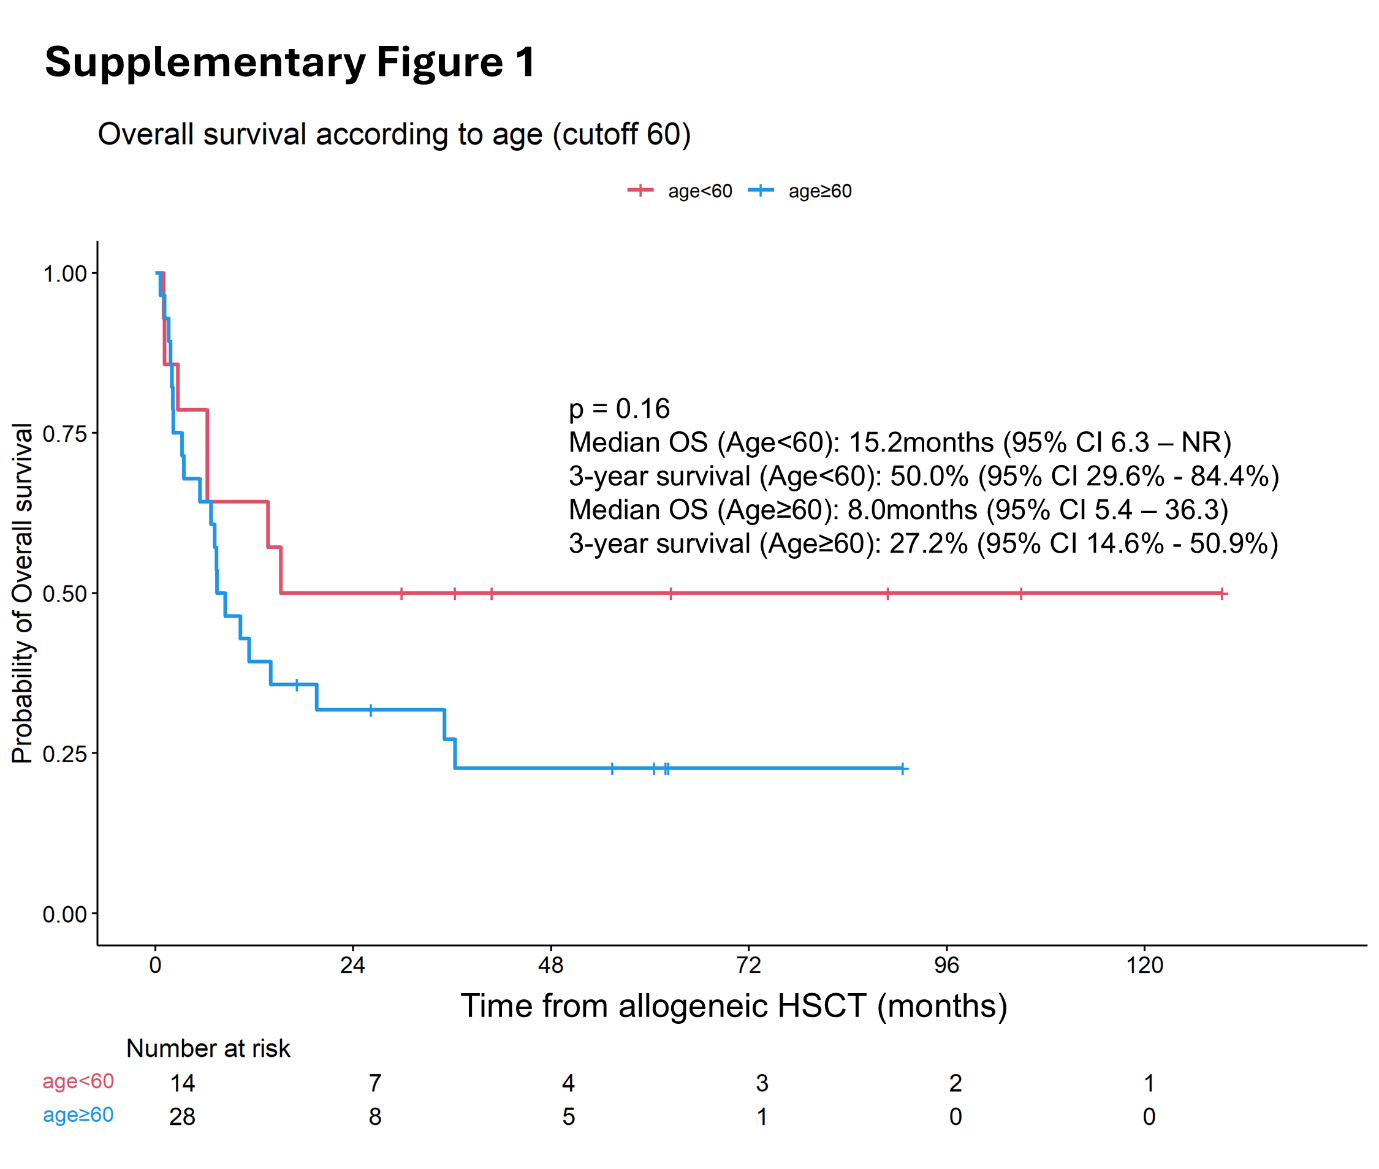


***Supplementary Figure 2. Overall survival by driver mutation status. Kaplan–Meier curves are compared using the log-rank test (p=0.10); Three patients with unknown driver mutation status were excluded. Analyses are exploratory given the small subgroup sizes.***


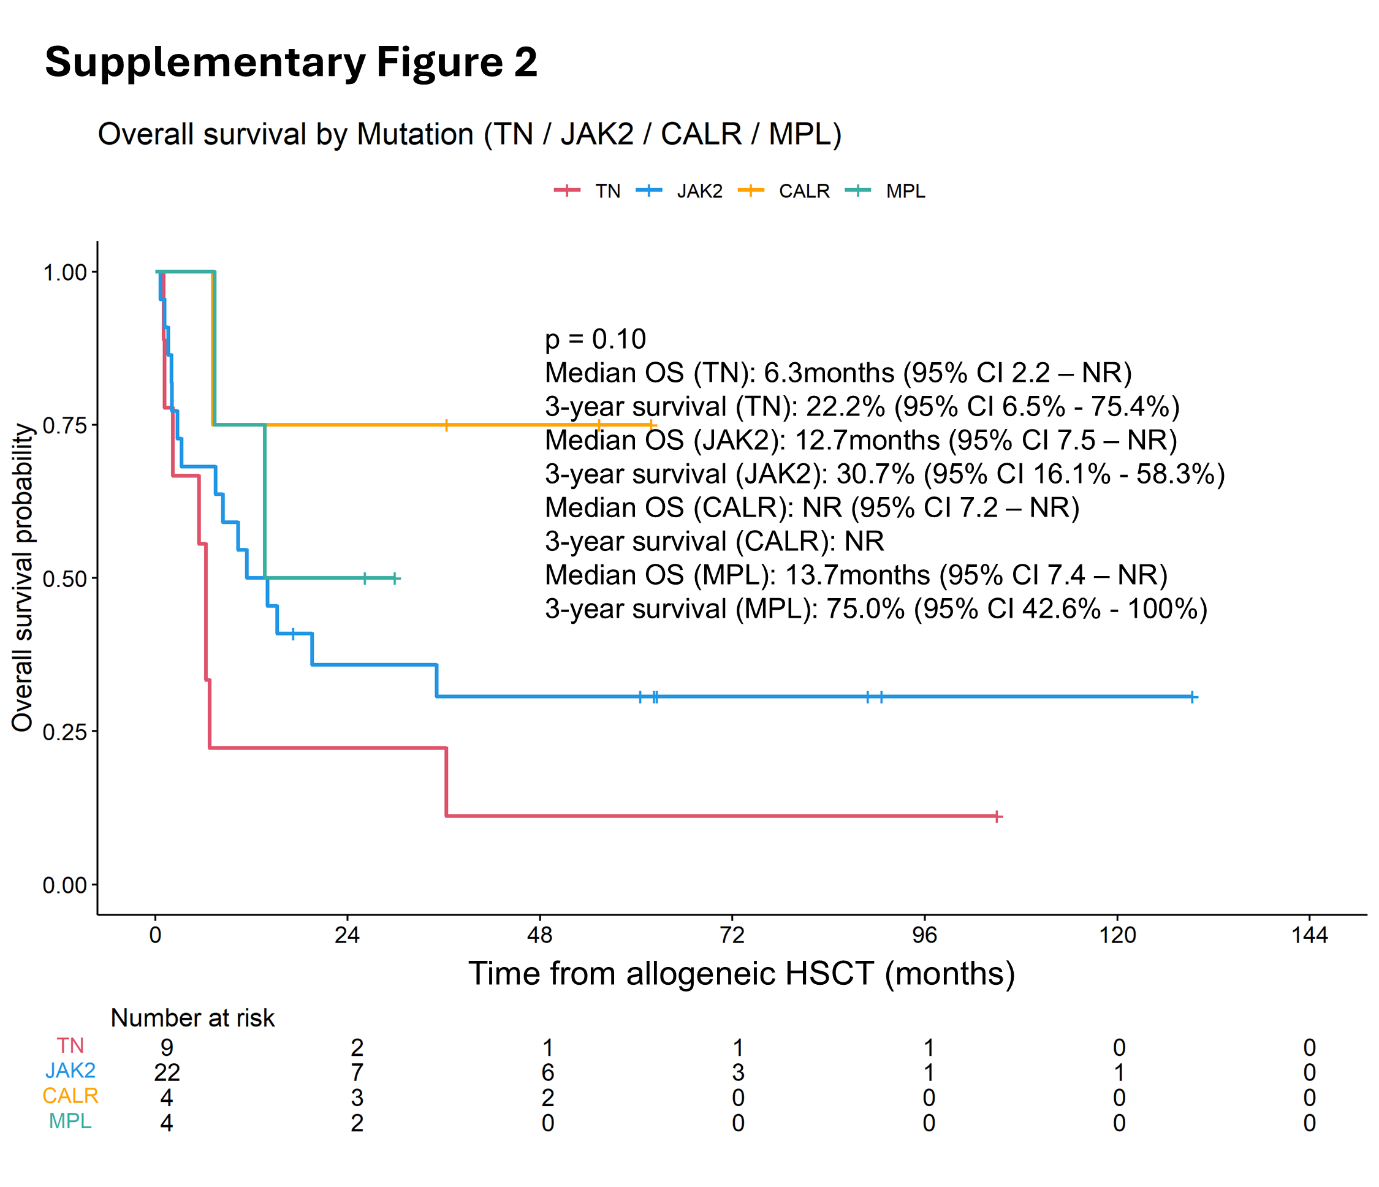


***Supplementary Figure 3. Overall survival by spleen size before HSCT (<22 cm vs ≥22 cm). One patient with prior splenectomy was excluded. Kaplan–Meier curves are compared using the log-rank test (p=0.85).***


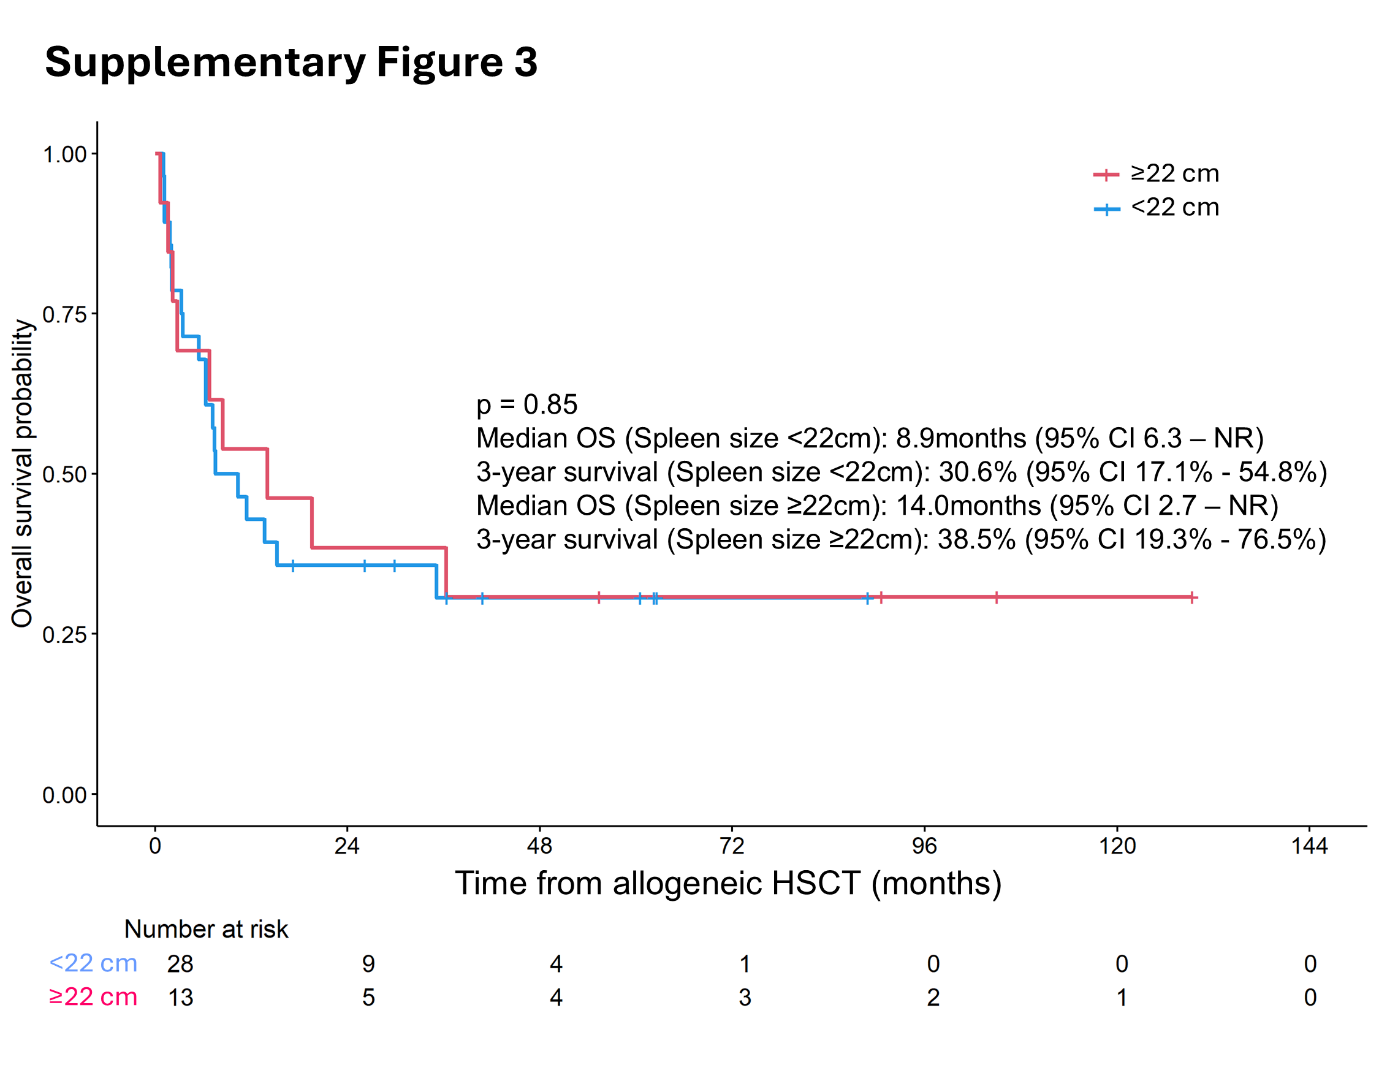


***Supplementary Figure 4. Swimmer plot of individual overall survival after allogeneic HSCT by DIPSS risk group at transplantation. Each horizontal bar represents one patient; bar length indicates time from HSCT to death or last follow-up. Bars are ordered by follow-up duration within each DIPSS risk group. End-of-bar symbols indicate death (×) or censoring (→).***


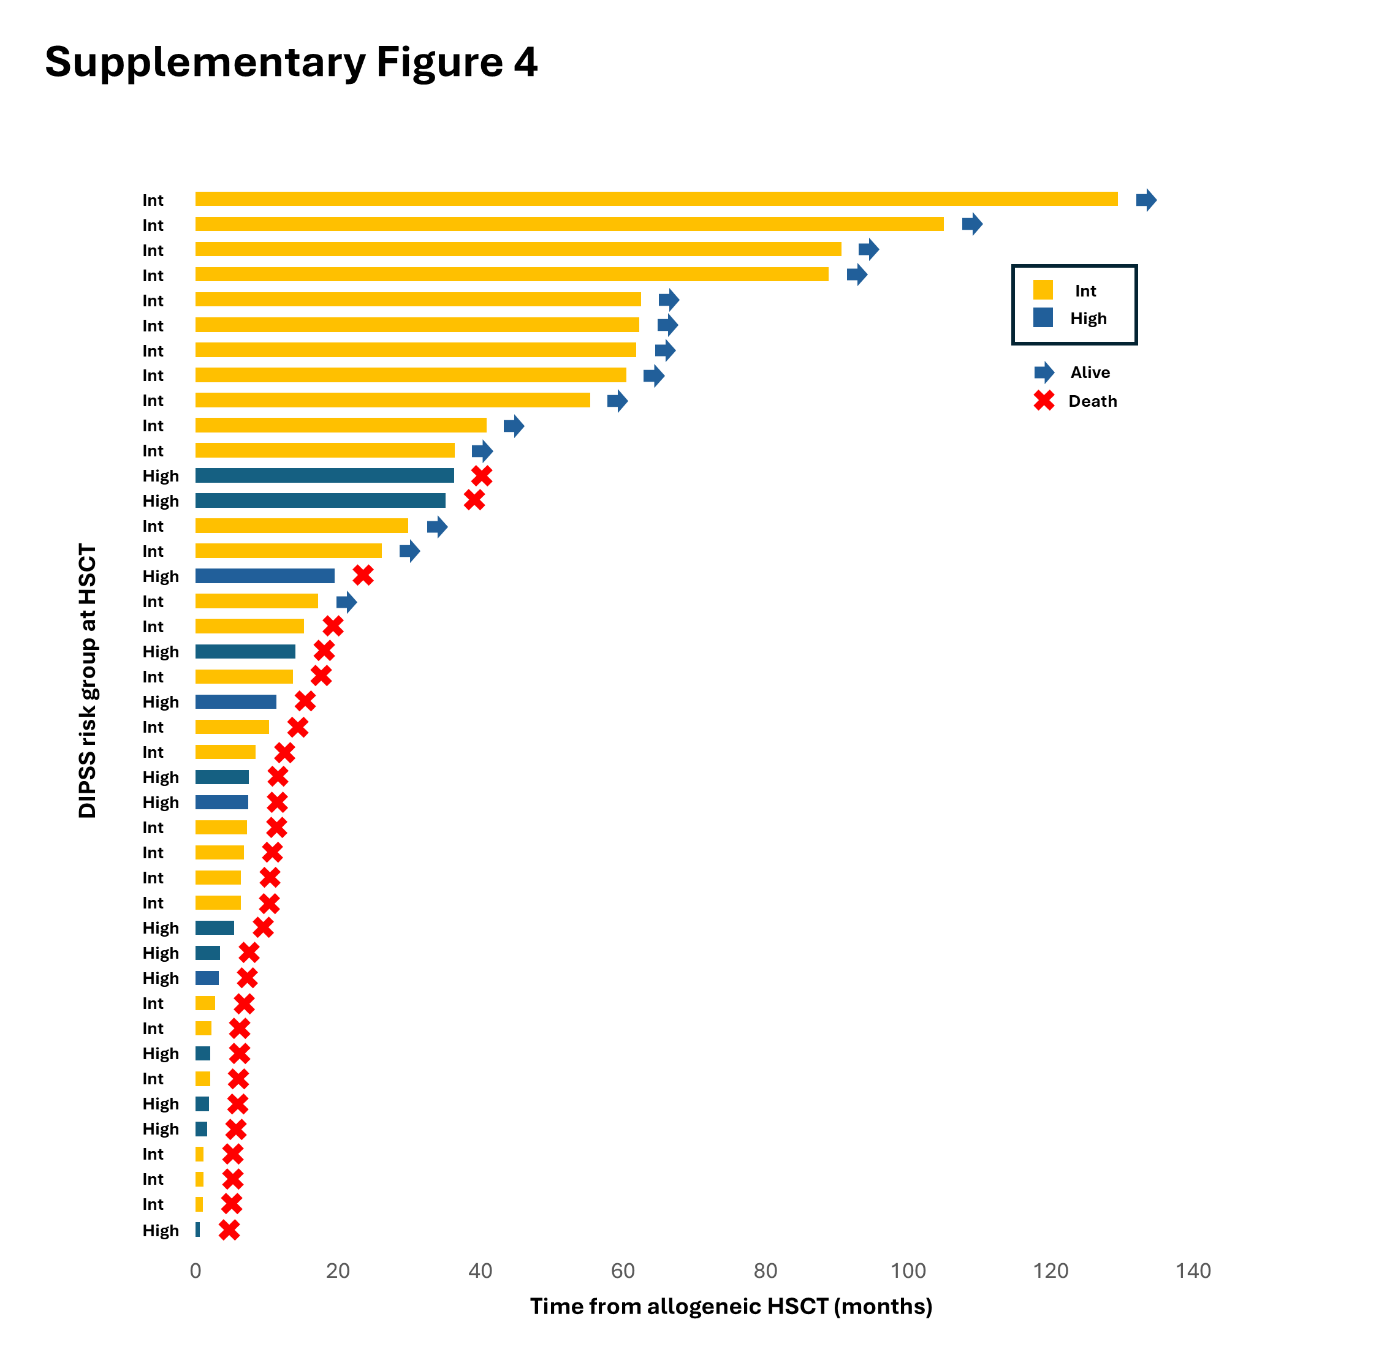

Supplement: Supplementary file 1 [file 1c179b2f9a8c23d7423a8b82.docx]
